# Supplementary material
Source: Springer Nature journal article supplement (http://www.springermedizin.de/resource/supplementary/13023_2009_165_MOESM4_ESM.pdf/9641808)

## Intronic deletions and splice site mutations

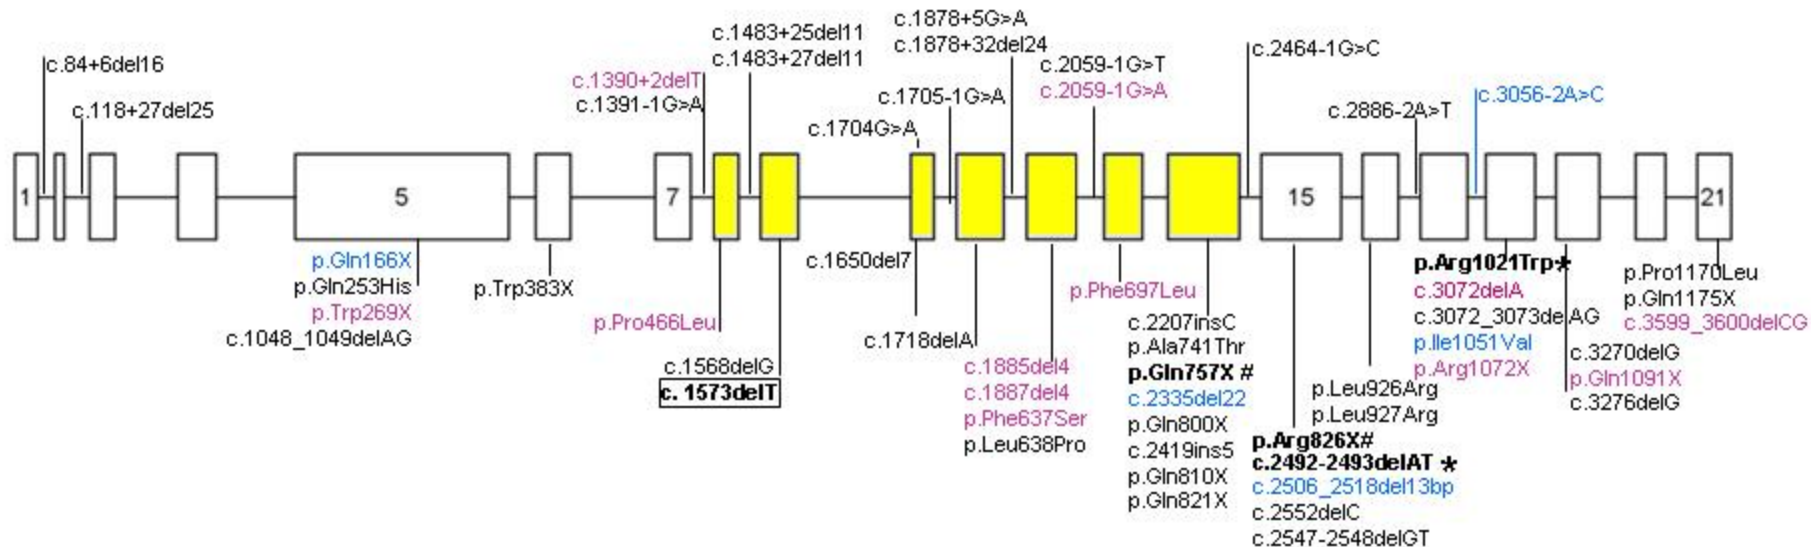

## Frameshift, missense and stop mutations

Supplement: MOESM4 [file 9641808]
